# Supplementary material for: Application of a Combined Transmittance/Fluorescence Leaf Clip Sensor for the Nondestructive Determination of Nitrogen Status in White Cabbage Plants
Source: MDPI journal article supplement (doi:10.3390/s21020482), 2021-01-12
Supplement: s1 [file s1]

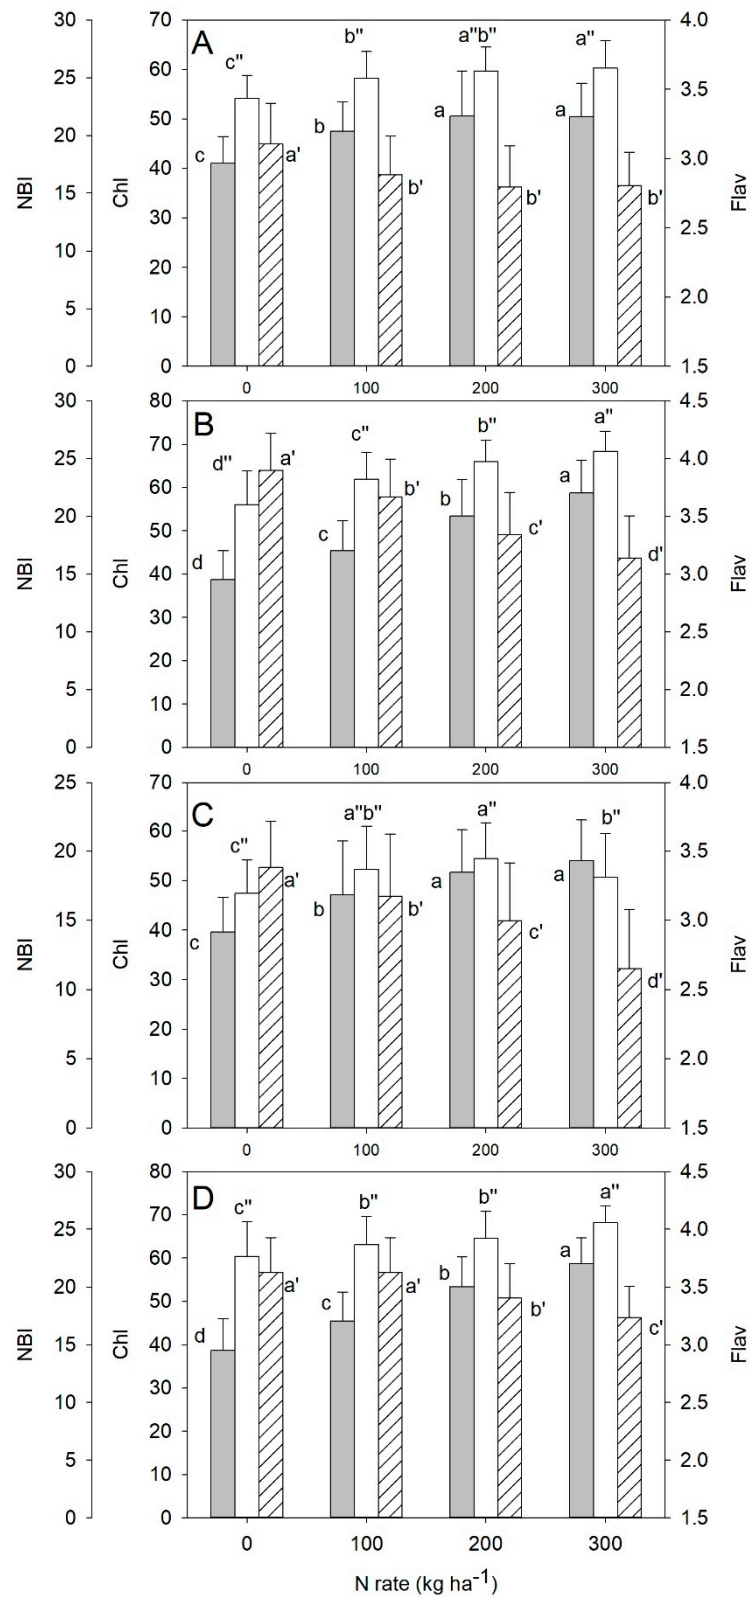

**Figure S1.** Average values (±SD) of the NBI (grey bars), Chl (white bars) and Flav (striped bars) Duallex indices as function of the N rates (n=90) indices in 2018: July (A) at 39 DAT, October (B) at 136 DAT and 2019: July (C) at 49 DAT, October (D) at 126 DAT. For each index, means followed by the same letter do not differ significantly at p=0.05 according to the Holm-SidakTukey test.
